# Supplementary material
Source: PubMed Central journal article supplement (PMC6334305)

# Supplementary Information

## Modulation of Colon Cancer by Nutmeg

Fei Li, Xiuwei Yang, Kristopher W. Krausz, Robert G. Nichols, Wei Xu, Andrew D.

Patterson, and Frank J. Gonzalez

**Supplementary table 1. Primer pairs used for qPCR**

| Gene                 |         | Accession Primer Sequence (5'-3') |
|----------------------|---------|-----------------------------------|
| <b>Mouse Primers</b> |         |                                   |
| IL-6                 | Forward | TGATGCACTTGCAGAAAACA              |
|                      | Reverse | ACCAGAGGAAATTTTCAATAGGC           |
| Ntcp                 | Forward | AGGGGGACATGAACCTCAG               |
|                      | Reverse | TCCGTCGTAGATTCCTTTGC              |
| Bsep                 | Forward | TCTGACTCAGTGATTCTTCGCA            |
|                      | Reverse | GTGTAGAGTGAAGTCCTCCTTAGC          |
| Cyp7a1               | Forward | AACAACCTGCCAGTACTAGATAGC          |
|                      | Reverse | GTGTAGAGTGAAGTCCTCCTTAGC          |
| Cpt2                 | Forward | TGACTGGATAGGCTGCAATGTC            |
|                      | Reverse | CGAGGGCATCGAACATGTCT              |
| Fasn                 | Forward | GTTGGCCCAGAACTCCTGTA              |
|                      | Reverse | GTCGTCTGCCTCCAGAGC                |
| Cyp4a10              | Forward | CCAGGAACTGCATTGGGAAA              |
|                      | Reverse | GACCCTGGTAGGATCTGGCA              |
| Acot1                | Forward | ATGGCAGCAGCTCCAGACTT              |
|                      | Reverse | CCCAACCTCCAAACCATCAT              |
| Beta actin           | Forward | TTCTTTGCAGCTCCTTCGTT              |
|                      | Reverse | ATGGAGGGGAATACAGCCC               |
| Mcad                 | Forward | AGCTCTAGACGAAGCCACGA              |
|                      | Reverse | GCGAGCAGAAATGAAACTCC              |
| Fasn                 | Forward | GCGACATGATTAATGGACA               |
|                      | Reverse | CCTGCAAATGTCAGAGGAAA              |
| <b>Human Primers</b> |         |                                   |
| Beta actin           | Forward | GTTGTGACGACGAGCG                  |
|                      | Reverse | GCACAGAGCCTCGCCTT                 |
| Cyp4a10              | Forward | GGGTGGAACCTTGACCTTCAG             |
|                      | Reverse | TAAGGGACGTTTCAAGTTGTG             |
| Fasn                 | Forward | TCTCCGACTCTGGCAGCTT               |
|                      | Reverse | GCTCCAGCCTCGCTCTC                 |
| Cpt2                 | Forward | CGGAGTCTCGAGCAGATAGG              |
|                      | Reverse | GGAAAAGAACTGCATGAGCA              |

**Supplementary figure 1. Chemical composition of supercritical nutmeg extract.** (A) Representative positive mode (ES+) chromatograms of major lignans in nutmeg extract. (B) Representative negative mode (ES-) chromatograms of major lignans in nutmeg extract. Dehydrodiisoeugenol (M1), licarin B (M2), 2,3-dihydro-7-methoxy-2-(3-methoxy-4,5-methylenedioxyphenyl)-3-methyl-5-(E)-propenyl-benzofuran (M3), 5-methoxy-dehydrodiisoeugenol (M4), myrislignan (M5), erythro-2-(4-allyl-2,6-dimethoxyphenoxy)-1-(3,4-dimethoxyphenyl)propane (M6), erythro-2-(4-allyl-2,6-dimethoxyphenoxy)-1-(3,4,5-trimethoxyphenyl)propane (M7), erythro-2-(4-allyl-2,6-dimethoxyphenoxy)-1-(3,4-dimethoxyphenyl)propan-1-ol (M8), erythro-2-(4-allyl-2,6-dimethoxyphenoxy)-1-(3,4,5-trimethoxyphenyl)propan-1-ol (M9).

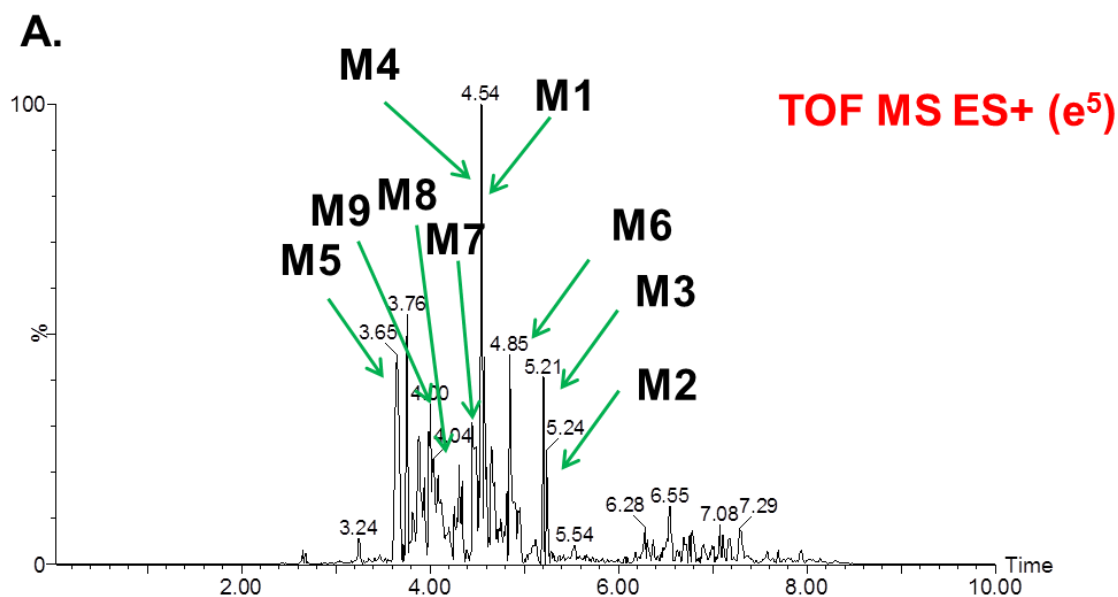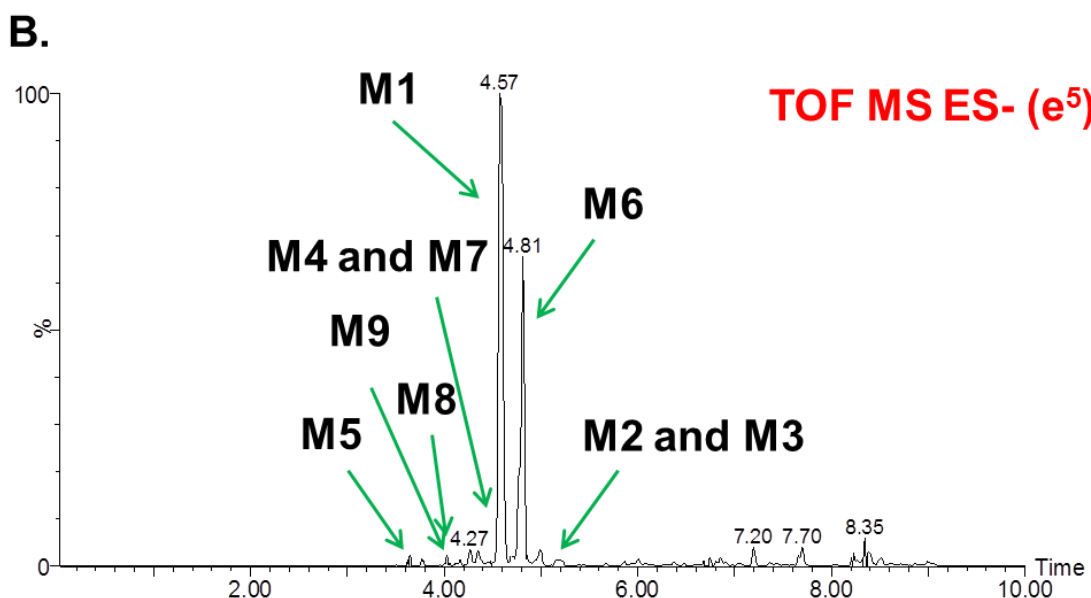

**Supplementary figure 2. Identification of the altered metabolites in the serum of *Apc<sup>min/+</sup>* mice.** (A-B) Retention time and MS/MS fragmentation patterns of azelaic acid in the serum and standard. (C-D) Retention time and MS/MS fragmentation patterns of cresol glucuronide in the serum and standard. (E-F) Retention time and MS/MS fragmentation patterns of cresol sulfate in the serum and standard. (G-H) Retention time and MS/MS fragmentation patterns of indoxyl sulfate in the serum and standard.

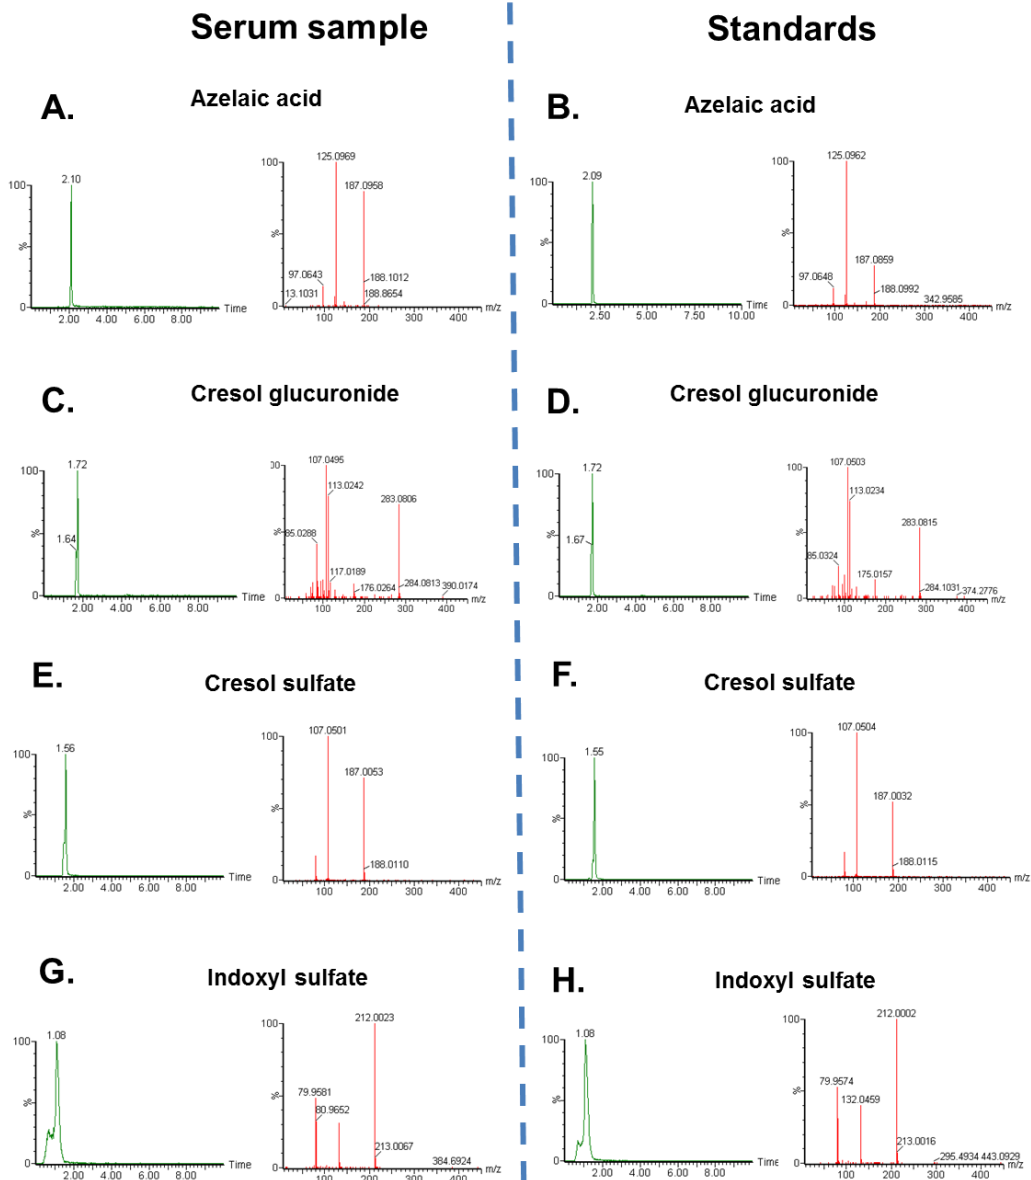

**Supplementary figure 3. The metabolism of bile acid is inhibited in *Apc<sup>min/+</sup>* mice and repaired in nutmeg-fed *Apc<sup>min/+</sup>* mice.** Hepatic mRNA analysis of the genes associated with bile acid synthesis and transport in *Apc<sup>min/+</sup>* mice and nutmeg-fed *Apc<sup>min/+</sup>* mice compared to the control group. The mRNA levels were normalized to those of  $\beta$ -actin mRNA. Statistical analysis was performed using two-tailed Student's t-test and ANOVA (n = 4/5 in each group). #,  $P < 0.05$  and ##,  $P < 0.01$  compared with WT mice; \$,  $P < 0.05$  compared with vehicle-fed *Apc<sup>min/+</sup>* mice.

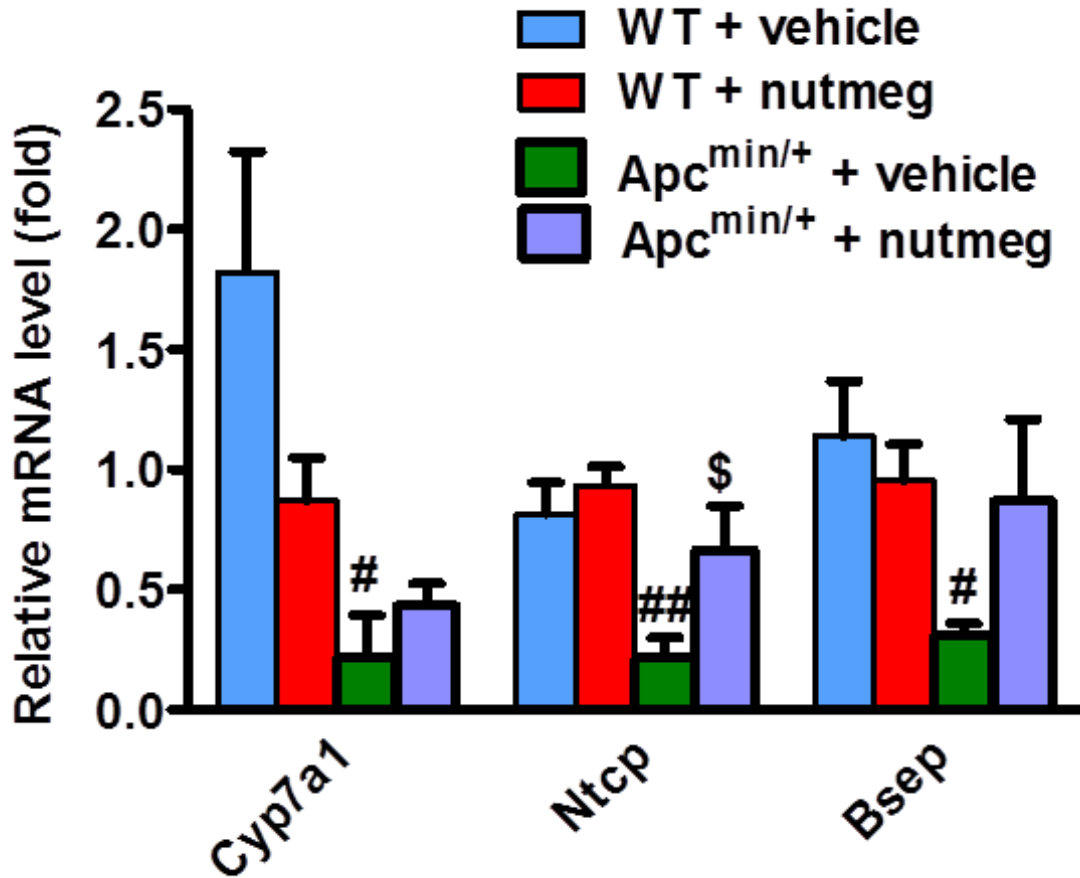

**Supplementary figure 4. Bile acids in *Apc<sup>min/+</sup>* mice are improved by nutmeg treatment.** Serum levels of TCA and TDCA in nutmeg-fed *Apc<sup>min/+</sup>* mice compared with vehicle-fed *Apc<sup>min/+</sup>* mice. Statistical analysis was performed using two-tailed Student's t-test and ANOVA (n = 4/5 in each group). \*,  $P < 0.05$  compared with vehicle-fed *Apc<sup>min/+</sup>* mice.

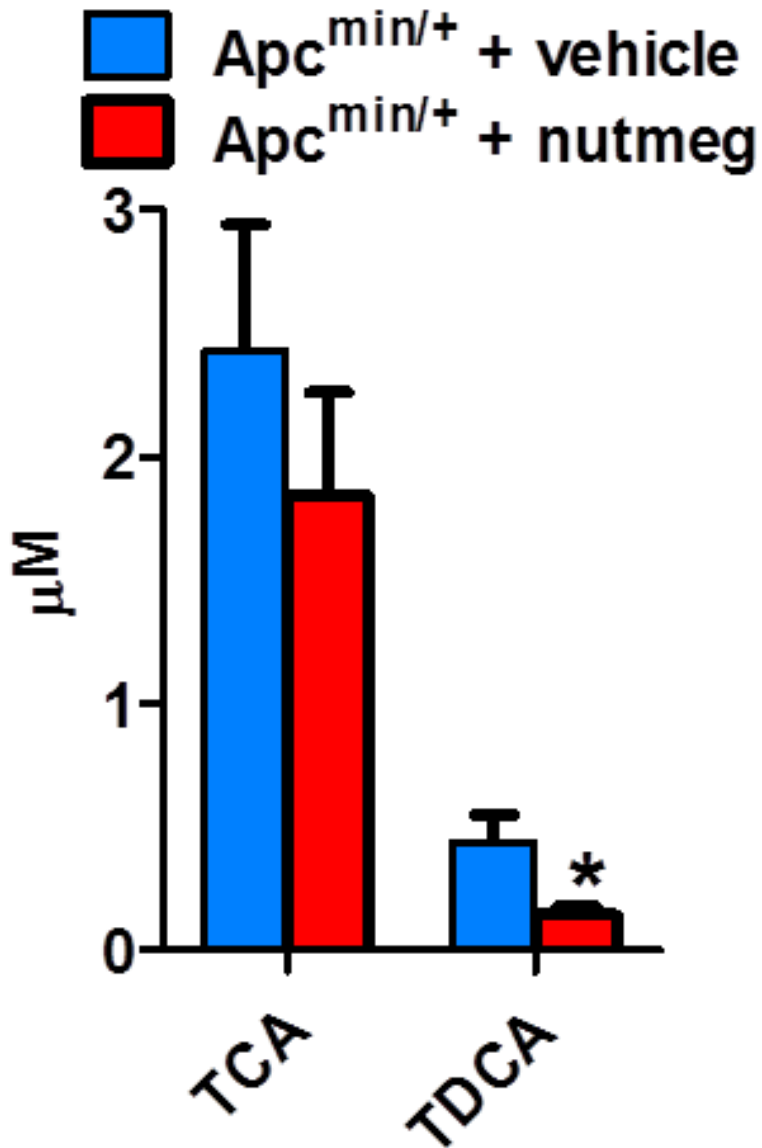

**Supplementary figure 5. Improvement of serum chemistry parameter in nutmeg-fed *Apc<sup>min/+</sup>* mice.** The levels of BUN in the serum of nutmeg-fed *Apc<sup>min/+</sup>* mice and vehicle-fed *Apc<sup>min/+</sup>* mice. Statistical analysis was performed using two-tailed Student's t-test and ANOVA (n = 4/5 in each group). \*,  $P < 0.05$  compared with vehicle-fed *Apc<sup>min/+</sup>* mice.

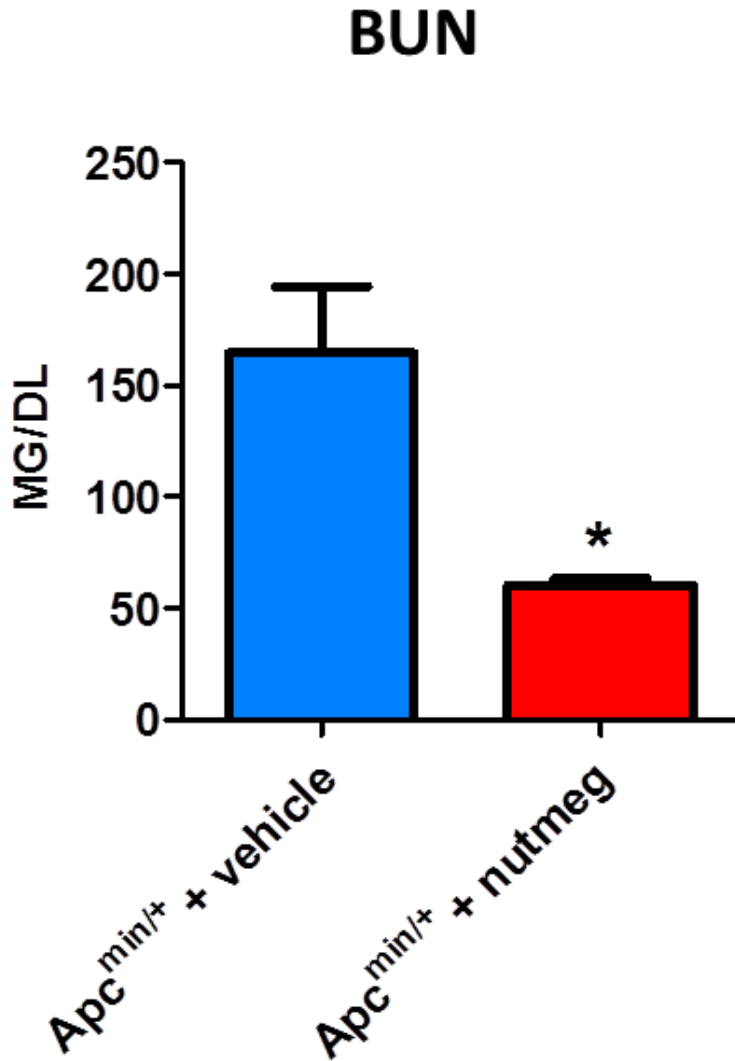

**Supplementary figure 6. The change of serum parameters following 4 month treatment with nutmeg extracts.** The levels of total protein (A), total bilirubin (B), phosphorus (C), calcium (D), potassium (E), total fatty acids (F), and triglyceride (G) in the serum of nutmeg-fed WT mice (WT + nutmeg) and vehicle-fed WT mice (Vehicle + nutmeg).

**A. Total protein**

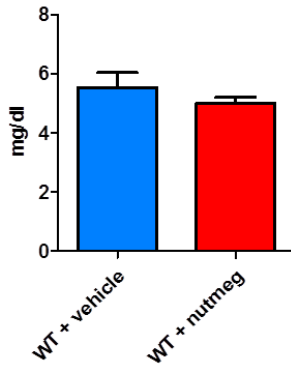

**B. Total bilirubin**

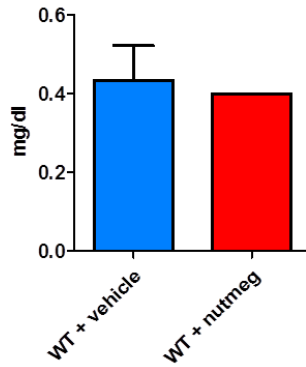

**C. Phosphorus**

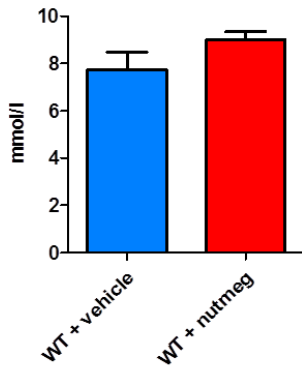

**D. Calcium**

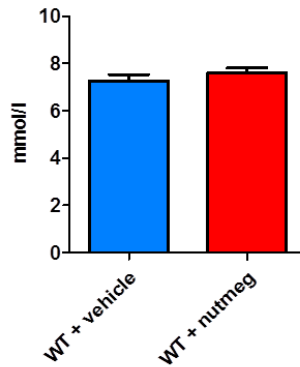

**E. Potassium**

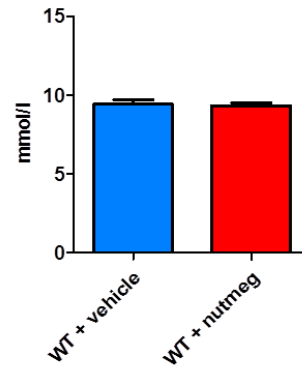

**F. Total fatty acids**

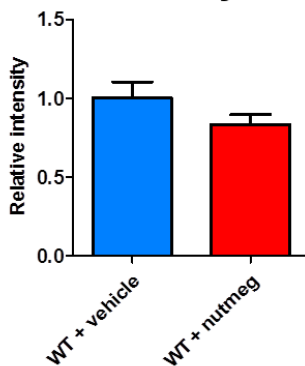

**G. Triglyceride**

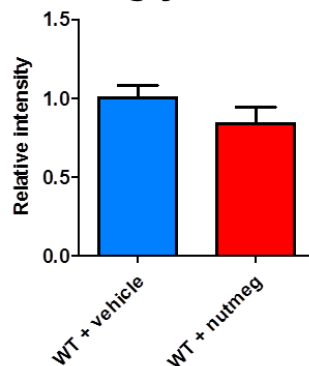

**Supplementary figure 7. Urinary excretion of uremic toxins in *Apc<sup>min/+</sup>* mice.** The levels of cresol sulfate, cresol glucuronide, indoxyl sulfate, and phenyl sulfate in the urine of *Apc<sup>min/+</sup>* and wild-type (WT) mice. Statistical analysis was performed using two-tailed Student's t-test and ANOVA (n = 4/5 in each group). \*,  $P < 0.05$  compared with WT mice.

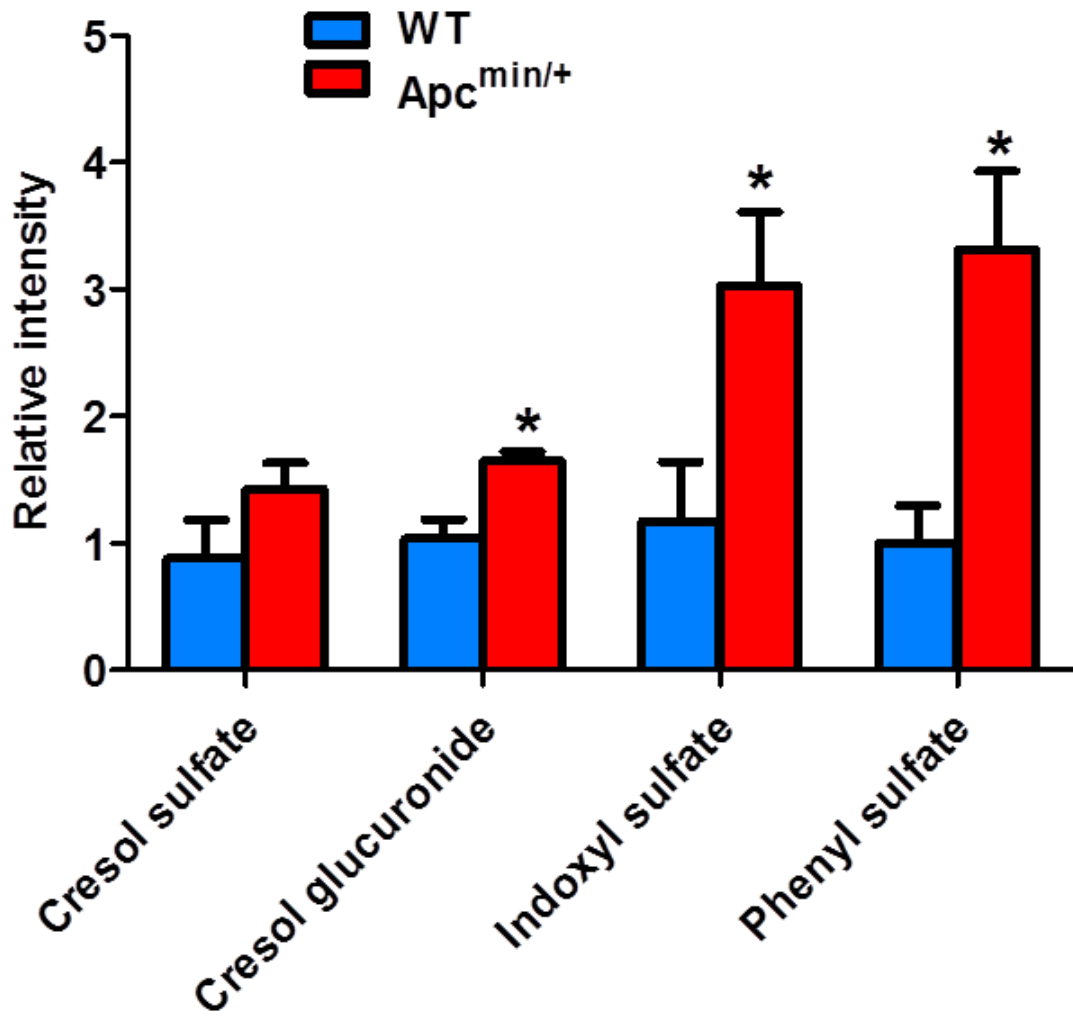

Supplement: NIHMS1000703-supplement-Supplemental.pdf [file NIHMS1000703-supplement-Supplemental.pdf]
